# Supplementary material
Source: PubMed Central journal article supplement (PMC6301043)
Supplement: NIHMS979284-supplement-Supplement.pdf [file NIHMS979284-supplement-Supplement.pdf]

# Comparison of PM<sub>2.5</sub> Exposure in Hazy and Non-hazy Days in Nanjing, China

**Ting Zhang<sup>1,2</sup>, Steven N. Chillrud<sup>2</sup>, Junfeng Ji<sup>1\*</sup>, Yang Chen<sup>1</sup>, Masha Pitiranggon<sup>2</sup>,  
Wenqing Li<sup>3</sup>, Zhenyang Liu<sup>1</sup>, Beizhan Yan<sup>2</sup>**

<sup>1</sup>*Key Laboratory of Surficial Geochemistry, Ministry of Education, Nanjing University, 163 Xianlin Ave, Qixia, Nanjing, 210023;*

<sup>2</sup>*Lamont Doherty Earth Observatory of Columbia University, 16 Rt. 9W, Palisades, NY 10964;*

<sup>3</sup>*Nanjing Municipal Environment Protection, 175 Huju Road, Gulou, Nanjing, 210093.*

**Supplement materials**

**Table. S1** Linear relationship between personal exposure PM<sub>2.5</sub> and central sites (NMEMC) simultaneously monitored PM<sub>2.5</sub> data. <sup>a</sup> Sub station and sub station UP represent underground and ground level subway stations, respectively. <sup>b</sup> Subway and subway UP represent underground and ground level subway cars.

| ME                 |          | Correl factor | Slope | N   | <i>p</i> | ME               |          | Correl factor | Slope | N   | <i>p</i> |
|--------------------|----------|---------------|-------|-----|----------|------------------|----------|---------------|-------|-----|----------|
| Road               | Haze     | 0.62          | 0.58  | 315 | 0.001    | Restaurant       | Haze     | 0.21          | 0.13  | 141 | 0.001    |
|                    | Non-haze | 0.51          | 0.11  | 142 | 0.001    |                  | Non-haze | 0.88          | 0.23  | 43  | 0.001    |
| Bus station        | Haze     | 0.64          | 0.69  | 215 | 0.001    | Subway           | Haze     | 0.53          | 1.26  | 113 | 0.001    |
|                    | Non-haze | 0.56          | 0.16  | 101 | 0.001    |                  | Non-haze | 0.6           | 0.26  | 31  | 0.001    |
| Sub station UP     | Haze     | 0.8           | 0.68  | 40  | 0.001    | Subway UP        | Haze     | 0.78          | 2.09  | 70  | 0.001    |
|                    | Non-haze | 0.99          | 0.23  | 17  | 0.001    |                  | Non-haze | 0.65          | 0.40  | 29  | 0.001    |
| Street food vendor | Haze     | 0.18          | 0.08  | 86  | 0.05     | Office           | Haze     | 0.56          | 0.79  | 410 | 0.001    |
|                    | Non-haze | 0.52          | 0.02  | 58  | 0.001    |                  | Non-haze | 0.66          | 0.33  | 157 | 0.001    |
| Construction       | Haze     | 0.49          | 0.30  | 164 | 0.001    | Lab              | Haze     | 0.55          | 0.84  | 59  | 0.001    |
|                    | Non-haze | 0.86          | 0.28  | 47  | 0.001    |                  | Non-haze | -0.34         | -0.31 | 27  | 0.01     |
| Park               | Haze     | 0.5           | 0.60  | 92  | 0.001    | Underground mall | Haze     | 0.13          | 0.07  | 50  | 0.5      |
|                    | Non-haze | 0.94          | 0.10  | 48  | 0.001    |                  | Non-haze | 0.72          | 0.10  | 9   | 0.02     |
| Schoolyard         | Haze     | 0.67          | 0.40  | 63  | 0.001    | Mall             | Haze     | 0.65          | 0.32  | 39  | 0.001    |
|                    | Non-haze | 0.81          | 0.21  | 30  | 0.001    |                  | Non-haze | 0.32          | 0.03  | 26  | 0.01     |
| Bus                | Haze     | 0.76          | 0.83  | 277 | 0.001    | Hospital         | Haze     | 0.87          | 0.46  | 72  | 0.001    |
|                    | Non-haze | 0.7           | 0.14  | 111 | 0.001    |                  | Non-haze | 0.97          | 0.32  | 31  | 0.001    |
| Taxi               | Haze     | 0.62          | 0.28  | 80  | 0.001    | Supermarket      | Haze     | 0.77          | 0.79  | 42  | 0.001    |
|                    | Non-haze | 0.84          | 0.22  | 51  | 0.001    |                  | Non-haze | 0.97          | 0.24  | 27  | 0.001    |
| Sub station        | Haze     | 0.59          | 0.47  | 119 | 0.001    |                  |          |               |       |     |          |
|                    | Non-haze | 0.77          | 0.09  | 53  | 0.001    |                  |          |               |       |     |          |

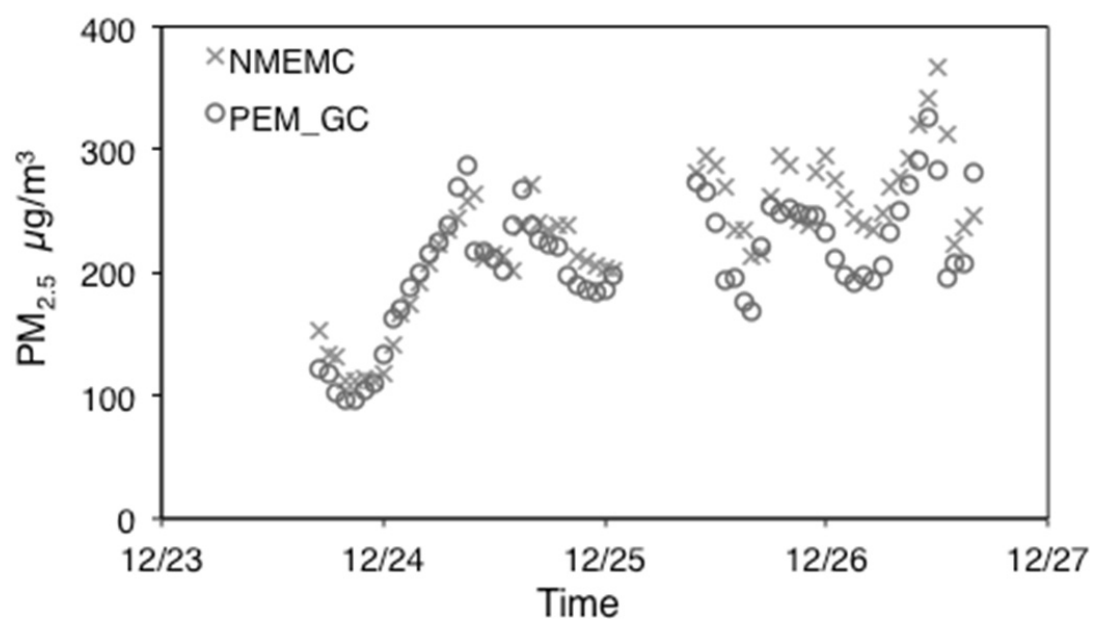

**Fig. S1** MicroPEM and BAM-1020 (NMEMC) side-by-side monitored  $PM_{2.5}$  hourly data comparison (Inlets of both units were at the same vertical height with horizontal distance of 2 m).

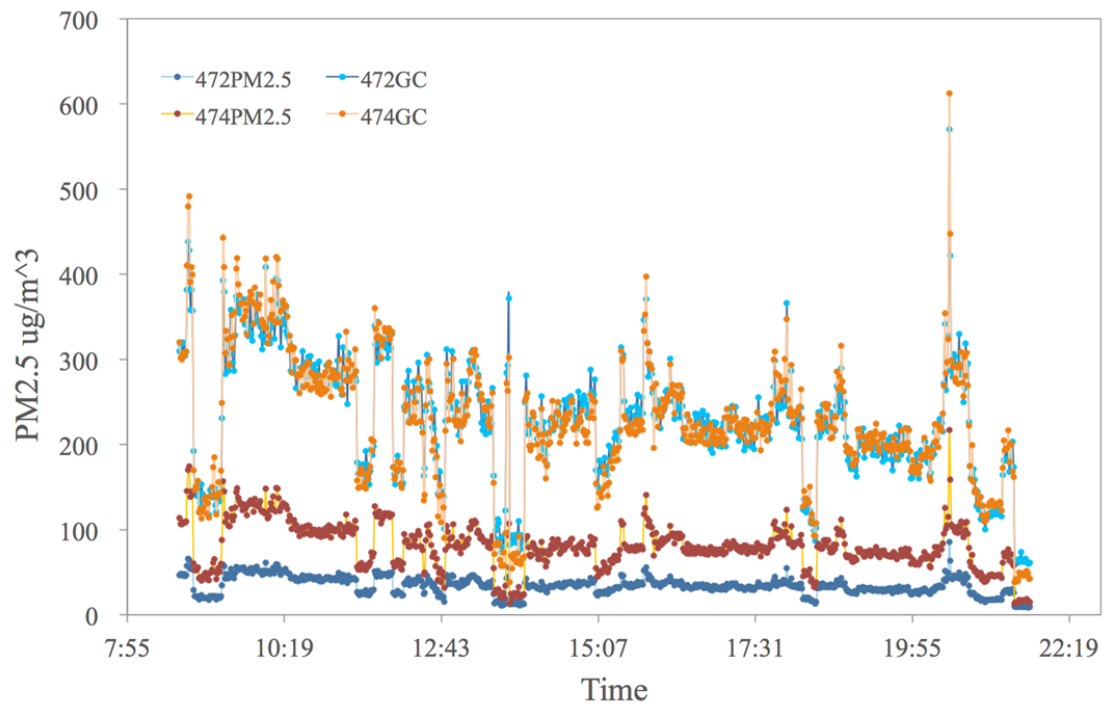

**Fig. S2.** Side-by-side personal PM<sub>2.5</sub> exposure comparison (minute average data) before (concentration measured by MicroPEM directly, 472PM<sub>2.5</sub> & 474PM<sub>2.5</sub>) and after gravimetric correction (472 GC & 474 GC; gravimetric correction ratio,  $r_{GC}$ , is 6.65 and 2.82 for 472 GC & 474 GC, respectively).
